# Supplementary material for: Theoretical modeling of pKa's of thiol compounds in aqueous solution
Source: Royal Society of Chemistry journal article supplement (doi:10.1039/c8nj06259e), 2019-01-01
Supplement: c8nj06259e1.pdf [file c8nj06259e1.pdf]

## Theoretical modeling of $pK_a$ 's of thiol compounds in aqueous solution

Yuanyuan Zheng, Wenrui Zheng\*, Danfeng Zhu and Huifang Chang

College of Chemistry and Chemical Engineering, Shanghai University of Engineering Science, Shanghai 201620, China

**Table S1** 58  $pK_a$ 's of thiols by 10 DFT methods with PCM-Bondi model in thermodynamic cycle 2.

| Entry | thiols                                                                              | Exp.  | M05   | M05-2X | M06   | M06-2X | M06-HF | M06-L | B3P86 | BMK   | KMLY<br>P | WB97XD |
|-------|-------------------------------------------------------------------------------------|-------|-------|--------|-------|--------|--------|-------|-------|-------|-----------|--------|
| 1     | 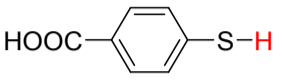   | 5.90  | 5.56  | 4.12   | 4.58  | 4.26   | 5.90   | 5.01  | 5.86  | 4.10  | 7.37      | 4.29   |
| 2     |    | 6.60  | 6.24  | 5.58   | 6.05  | 4.77   | 6.60   | 5.83  | 5.69  | 5.63  | 8.25      | 5.10   |
| 3     |    | 4.90  | 5.76  | 5.18   | 5.90  | 5.09   | 4.90   | 5.26  | 5.15  | 4.69  | 7.22      | 4.67   |
| 4     |    | 5.17  | 6.35  | 4.93   | 6.29  | 5.04   | 5.17   | 5.64  | 5.30  | 4.53  | 7.98      | 4.78   |
| 5     |    | 6.40  | 7.78  | 7.07   | 7.55  | 6.81   | 6.40   | 6.82  | 7.09  | 6.26  | 9.26      | 6.36   |
| 6     |   | 7.01  | 9.02  | 7.48   | 8.85  | 8.79   | 7.00   | 7.80  | 9.03  | 7.28  | 10.98     | 7.96   |
| 7     |  | 6.90  | 7.95  | 7.59   | 8.22  | 7.83   | 6.90   | 6.87  | 8.12  | 6.73  | 10.46     | 7.94   |
| 8     |  | 4.61  | 4.76  | 2.39   | 4.35  | 6.32   | 4.61   | 5.40  | 4.71  | 4.49  | 5.91      | 3.15   |
| 9     |  | 6.55  | 7.86  | 6.55   | 6.74  | 6.09   | 6.55   | 6.31  | 7.52  | 7.49  | 9.96      | 6.79   |
| 10    |  | 5.70  | 15.22 | 7.14   | 7.52  | 7.37   | 5.70   | 4.61  | 7.74  | 7.02  | 6.95      | 6.63   |
| 11    |  | 7.31  | 9.65  | 9.74   | 9.66  | 9.72   | 7.30   | 8.43  | 9.41  | 9.07  | 11.52     | 8.83   |
| 12    |  | 8.60  | 7.01  | 4.79   | 6.72  | 4.18   | 8.60   | 7.70  | 5.77  | 7.04  | 6.73      | 5.71   |
| 13    |  | 9.60  | 12.16 | 11.50  | 11.75 | 11.63  | 9.60   | 10.68 | 11.73 | 11.49 | 13.87     | 11.09  |
| 14    |  | 3.20  | 1.52  | 0.01   | 1.13  | 0.05   | 3.20   | 4.90  | 1.07  | 1.48  | 2.40      | 1.05   |
| 15    |  | 2.68  | 1.78  | 2.82   | 2.28  | 2.20   | 2.68   | 3.30  | 0.36  | 1.01  | 3.27      | 1.38   |
| 16    |  | 7.91  | 14.86 | 11.66  | 10.47 | 12.18  | 7.86   | 9.86  | 13.95 | 13.57 | 14.45     | 10.64  |
| 17    |  | 8.30  | 12.52 | 12.93  | 11.20 | 12.87  | 8.30   | 10.04 | 11.22 | 10.47 | 12.79     | 12.49  |
| 18    |  | 10.50 | 10.04 | 8.73   | 10.14 | 7.55   | 10.50  | 13.12 | 10.78 | 10.14 | 15.24     | 14.70  |
| 19    |  | 10.61 | 12.22 | 11.35  | 12.07 | 12.02  | 10.61  | 10.32 | 11.00 | 10.94 | 13.59     | 11.27  |
| 20    |  | 10.86 | 13.00 | 12.11  | 12.78 | 12.69  | 10.86  | 11.41 | 12.50 | 11.93 | 14.79     | 12.35  |
| 21    |  | 11.30 | 12.87 | 12.42  | 12.36 | 12.64  | 11.31  | 12.32 | 13.16 | 16.47 | 15.91     | 12.68  |
| 22    |  | 9.92  | 12.27 | 12.04  | 13.13 | 11.93  | 9.92   | 11.70 | 15.27 | 14.98 | 17.89     | 13.96  |
| 23    |  | 3.62  | 4.09  | 3.59   | 2.63  | 4.28   | 3.62   | 5.10  | 1.59  | 2.26  | 6.54      | 3.09   |
| 24    |  | 9.43  | 11.09 | 10.50  | 11.10 | 11.16  | 9.43   | 11.58 | 10.54 | 11.36 | 12.78     | 11.06  |
| 25    |  | 10.88 | 13.92 | 12.85  | 13.19 | 12.65  | 10.88  | 12.25 | 12.65 | 12.60 | 13.78     | 13.23  |
| 26    |  | 6.89  | 5.46  | 4.77   | 5.62  | 6.96   | 6.89   | 6.68  | 4.50  | 3.72  | 9.34      | 6.08   |
| 27    |  | 6.78  | 8.54  | 8.37   | 8.12  | 7.96   | 6.78   | 8.04  | 7.82  | 6.96  | 9.34      | 7.24   |

\* Corresponding author. Tel.: +86 21 67791216; fax: +86 21 67791220.  
E-mail address: wrzheng@sues.edu.cn (W.R. Zheng).

|    |                                                                                     |       |       |       |       |       |       |       |       |       |       |       |
|----|-------------------------------------------------------------------------------------|-------|-------|-------|-------|-------|-------|-------|-------|-------|-------|-------|
| 28 |    | 6.82  | 7.82  | 7.57  | 6.62  | 7.63  | 6.82  | 7.37  | 8.02  | 7.19  | 10.48 | 6.75  |
| 29 |    | 7.00  | 8.73  | 7.82  | 8.06  | 8.60  | 7.00  | 7.68  | 7.66  | 7.16  | 10.09 | 8.05  |
| 30 |    | 6.60  | 8.28  | 7.73  | 7.40  | 5.91  | 6.60  | 7.79  | 7.15  | 6.83  | 10.15 | 6.97  |
| 31 |    | 6.02  | 7.06  | 5.79  | 6.35  | 6.20  | 6.02  | 6.22  | 6.48  | 6.19  | 8.26  | 6.07  |
| 32 |    | 5.78  | 5.49  | 6.38  | 6.47  | 5.71  | 5.78  | 6.17  | 6.68  | 5.24  | 8.78  | 6.13  |
| 33 |    | 5.68  | 8.70  | 5.96  | 5.09  | 8.16  | 5.24  | 5.76  | 9.38  | 7.58  | 8.83  | 5.33  |
| 34 | $\text{CH}_3\text{S-H}$                                                             | 10.33 | 14.49 | 11.92 | 12.16 | 12.03 | 10.30 | 11.17 | 11.96 | 11.89 | 13.81 | 11.80 |
| 35 | $\text{CH}_3\text{CH}_2\text{CH}_2\text{S-H}$                                       | 10.70 | 12.40 | 12.47 | 12.46 | 12.62 | 10.70 | 11.78 | 11.85 | 12.29 | 14.33 | 12.17 |
| 36 |    | 5.24  | 8.70  | 5.96  | 5.09  | 8.16  | 6.85  | 5.76  | 9.38  | 7.58  | 8.83  | 5.33  |
| 37 |  | 5.30  | 5.67  | 4.61  | 4.09  | 3.66  | 5.30  | 6.40  | 0.33  | 1.48  | 4.76  | 3.65  |
| 38 |  | 6.14  | 7.58  | 7.09  | 6.66  | 5.86  | 6.14  | 5.81  | 6.60  | 5.36  | 8.97  | 6.63  |
| 39 |  | 7.86  | 8.36  | 7.75  | 7.92  | 8.28  | 7.86  | 6.79  | 8.38  | 7.43  | 12.04 | 7.93  |
| 40 |  | 7.95  | 10.63 | 8.75  | 6.71  | 5.14  | 7.95  | 8.80  | 7.52  | 7.65  | 9.31  | 10.21 |
| 41 |  | 8.62  | 11.75 | 9.16  | 13.65 | 11.50 | 8.62  | 7.20  | 13.81 | 10.16 | 12.97 | 11.09 |
| 42 | $\text{H}_3\text{CH}_2\text{C-OCH}_2\text{CH}_2\text{S-H}$                          | 9.38  | 9.50  | 9.46  | 10.08 | 10.00 | 9.38  | 8.62  | 9.42  | 8.78  | 11.70 | 9.55  |
| 43 |  | 9.51  | 6.73  | 2.11  | 6.09  | 7.45  | 9.51  | 8.30  | 6.27  | 5.79  | 8.76  | 5.87  |
| 44 |  | 9.85  | 11.47 | 11.58 | 10.98 | 11.29 | 9.85  | 10.55 | 11.62 | 11.72 | 13.92 | 10.98 |
| 45 | $\text{H}_2\text{C=CHCH}_2\text{S-H}$                                               | 9.96  | 10.22 | 11.30 | 11.65 | 11.61 | 9.96  | 11.90 | 8.84  | 10.95 | 11.60 | 11.68 |
| 46 |  | 9.04  | 3.92  | 3.87  | 2.70  | 3.60  | 9.04  | 8.68  | 3.44  | 1.67  | 6.01  | 0.68  |
| 47 |  | 8.55  | 9.47  | 10.40 | 10.20 | 9.52  | 8.55  | 9.28  | 9.37  | 8.98  | 12.11 | 9.52  |
| 48 | $\text{H}_2\text{N-CH}_2\text{CH}_2\text{S-H}$                                      | 10.53 | 10.82 | 10.63 | 12.00 | 10.45 | 10.53 | 10.53 | 10.63 | 10.84 | 13.01 | 10.55 |
| 49 |  | 10.57 | 7.35  | 7.67  | 7.94  | 6.97  | 10.57 | 9.20  | 8.91  | 6.88  | 10.46 | 7.59  |
| 50 |  | 11.22 | 13.10 | 12.58 | 13.65 | 12.40 | 11.22 | 12.33 | 13.17 | 13.70 | 15.95 | 12.23 |
| 51 | $\text{HS-(CH}_2)_2\text{S-H}$                                                      | 9.05  | 10.93 | 11.15 | 9.62  | 9.45  | 9.05  | 8.41  | 10.34 | 9.52  | 16.12 | 11.07 |
| 52 |  | 8.82  | 9.78  | 9.91  | 10.33 | 9.35  | 8.82  | 10.07 | 9.82  | 10.32 | 11.91 | 9.68  |
| 53 |  | 10.69 | 12.48 | 12.80 | 12.66 | 12.49 | 10.69 | 11.74 | 12.24 | 11.58 | 14.49 | 11.95 |
| 54 |  | 6.39  | 6.60  | 6.47  | 8.21  | 8.82  | 6.39  | 6.09  | 6.84  | 6.77  | 9.31  | 7.12  |
| 55 | $\text{HO-(CH}_2)_4\text{S-H}$                                                      | 10.19 | 12.54 | 12.35 | 12.15 | 12.09 | 10.19 | 11.69 | 11.91 | 12.28 | 14.07 | 12.75 |
| 56 |  | 9.33  | 9.52  | 9.92  | 8.73  | 9.32  | 9.33  | 8.12  | 8.94  | 9.31  | 11.26 | 9.70  |
| 57 | $\text{HS-(CH}_2)_4\text{S-H}$                                                      | 9.88  | 13.02 | 12.15 | 11.68 | 12.02 | 9.88  | 11.57 | 10.33 | 11.24 | 13.90 | 10.94 |
| 58 |  | 9.26  | 11.35 | 13.21 | 12.59 | 9.99  | 9.26  | 8.90  | 13.19 | 11.94 | 13.67 | 11.99 |

**Table S2** 58  $pK_a$ 's of thiols by M06-L and M06-2X methods with PCM-Bondi and SMD<sub>SSAS</sub> models in thermodynamic cycles 1 and 2.

| Entry | thiols                                                                              | Exp.  | PCM-Bondi |         | SMD <sub>SSAS</sub> |         |         |
|-------|-------------------------------------------------------------------------------------|-------|-----------|---------|---------------------|---------|---------|
|       |                                                                                     |       | M06-L     | M06-L   | M06-2X              |         |         |
|       |                                                                                     |       | Cycle 1   | Cycle 1 | Cycle 2             | Cycle 1 | Cycle 2 |
| 1     | 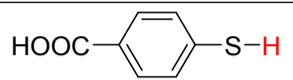   | 5.90  | 9.6       | 7.9     | 10.0                | 5.1     | 3.5     |
| 2     |    | 6.60  | 11.7      | 9.1     | 11.9                | 6.4     | 4.7     |
| 3     |    | 4.90  | 9.3       | 7.1     | 9.9                 | 5.1     | 3.5     |
| 4     |    | 5.17  | 9.4       | 8.7     | 9.7                 | 5.1     | 4.2     |
| 5     |    | 6.40  | 11.7      | 10.6    | 11.2                | 6.1     | 8.0     |
| 6     |    | 7.01  | 9.4       | 12.0    | 14.9                | 7.0     | 5.5     |
| 7     |    | 6.90  | 5.5       | 9.7     | 12.3                | 7.1     | 7.8     |
| 8     |   | 4.61  | 7.8       | 6.4     | 8.2                 | 3.9     | 3.3     |
| 9     |  | 6.55  | 5.6       | 8.9     | 12.2                | 6.7     | 4.8     |
| 10    |  | 5.70  | 11.0      | 8.8     | 11.6                | 6.9     | 6.9     |
| 11    |  | 7.31  | 12.7      | 10.6    | 12.7                | 7.9     | 6.7     |
| 12    |  | 8.60  | 12.3      | 12.8    | 12.8                | 9.2     | 11.2    |
| 13    |  | 9.60  | 5.8       | 12.1    | 15.2                | 10.6    | 8.1     |
| 14    |  | 3.20  | 6.1       | 4.4     | 5.9                 | 2.5     | 0.6     |
| 15    |  | 2.68  | 6.7       | 4.8     | 8.3                 | 2.0     | -0.3    |
| 16    |  | 7.91  | 5.9       | 11.3    | 13.6                | 8.1     | 7.8     |
| 17    |  | 8.30  | 6.2       | 11.9    | 14.2                | 10.2    | 7.6     |
| 18    |  | 10.50 | 13.2      | 10.1    | 14.5                | 9.5     | 6.0     |
| 19    |  | 10.61 | 14.0      | 13.1    | 15.4                | 11.1    | 10.3    |
| 20    |  | 10.86 | 8.8       | 14.4    | 16.0                | 11.5    | 10.4    |
| 21    |  | 11.30 | 9.9       | 13.4    | 16.5                | 10.9    | 10.4    |
| 22    |  | 9.92  | 14.6      | 15.2    | 14.4                | 10.8    | 9.5     |
| 23    |  | 3.62  | 8.9       | 6.7     | 8.7                 | 3.2     | 3.4     |
| 24    |  | 9.43  | 15.1      | 14.4    | 14.7                | 9.2     | 9.6     |
| 25    |  | 10.88 | 16.0      | 13.2    | 15.3                | 11.4    | 9.6     |
| 26    |  | 6.89  | 12.2      | 10.8    | 12.1                | 6.9     | 6.3     |
| 27    |  | 6.78  | 12.2      | 9.8     | 12.2                | 7.7     | 6.6     |
| 28    |  | 6.82  | 10.9      | 9.4     | 12.3                | 6.8     | 6.9     |
| 29    |  | 7.00  | 12.0      | 9.8     | 11.9                | 7.0     | 8.0     |

|    |                                                                                                             |       |      |      |      |      |      |
|----|-------------------------------------------------------------------------------------------------------------|-------|------|------|------|------|------|
| 30 | 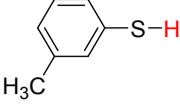                           | 6.60  | 11.7 | 9.3  | 11.9 | 6.6  | 5.2  |
| 31 |                            | 6.02  | 11.2 | 7.6  | 11.1 | 6.2  | 4.1  |
| 32 |                            | 5.78  | 5.0  | 8.0  | 10.6 | 5.8  | 5.2  |
| 33 |                            | 5.68  | 10.2 | 7.9  | 10.2 | 5.5  | 4.3  |
| 34 | $\text{CH}_3\text{S}-\text{H}$                                                                              | 10.33 | 6.2  | 12.9 | 15.9 | 11.3 | 10.7 |
| 35 | $\text{CH}_3\text{CH}_2\text{CH}_2\text{S}-\text{H}$                                                        | 10.70 | 6.1  | 13.4 | 16.1 | 11.4 | 10.3 |
| 36 |                            | 5.24  | 6.1  | 7.7  | 10.2 | 6.60 | 3.7  |
| 37 |                            | 5.30  | 10.4 | 9.8  | 10.3 | 5.4  | 4.5  |
| 38 |                            | 6.14  | 5.2  | 8.8  | 11.2 | 7.6  | 4.4  |
| 39 | $\text{H}_2\text{C}=\overset{\text{CH}_3}{\text{C}}\text{S}-\text{H}$                                       | 7.86  | 12.3 | 9.4  | 12.6 | 7.6  | 5.7  |
| 40 | $\text{H}_3\text{CH}_2\text{COCCH}_2\text{S}-\text{H}$                                                      | 7.95  | 6.0  | 12.0 | 13.5 | 8.4  | 7.3  |
| 41 | $\text{HSC}(\text{CH}_2\text{OH})\text{CH}_2\text{S}-\text{H}$                                              | 8.62  | 5.8  | 10.4 | 13.8 | 10.2 | 9.0  |
| 42 | $\text{H}_3\text{CH}_2\text{C}-\text{OCH}_2\text{CH}_2\text{S}-\text{H}$                                    | 9.38  | 6.2  | 13.0 | 15.1 | 9.5  | 7.7  |
| 43 | $\text{HO}-\text{CH}_2\overset{\text{OH}}{\text{C}}\text{HCH}_2\text{S}-\text{H}$                           | 9.51  | 12.5 | 12.5 | 14.7 | 10.4 | 9.0  |
| 44 | $\text{HOH}_2\text{C}-\overset{\text{CH}_3}{\underset{\text{CH}_3}{\text{C}}}\text{S}-\text{H}$             | 9.85  | 5.3  | 12.5 | 15.1 | 10.3 | 8.9  |
| 45 | $\text{H}_2\text{C}=\text{CHCH}_2\text{S}-\text{H}$                                                         | 9.96  | 14.7 | 12.0 | 14.4 | 9.8  | 8.7  |
| 46 | $\text{HSC}(\text{CH}_3)(\text{OH})\text{CH}_2\text{S}-\text{H}$                                            | 9.04  | 5.3  | 11.5 | 13.9 | 9.7  | 7.6  |
| 47 | $\text{H}_3\text{COCHN}-\overset{\text{COOH}}{\text{C}}\text{HCH}_2\text{S}-\text{H}$                       | 8.55  | 5.7  | 9.5  | 13.8 | 8.9  | 8.4  |
| 48 | $\text{H}_2\text{N}-\text{CH}_2\text{CH}_2\text{S}-\text{H}$                                                | 10.53 | 15.2 | 12.8 | 14.8 | 10.1 | 8.5  |
| 49 | $\text{HSC}(\text{CH}_2\text{OH})\text{CH}_2\text{S}-\text{H}$                                              | 10.57 | 14.3 | 12.0 | 13.4 | 9.1  | 7.7  |
| 50 | $\text{H}_3\text{CH}_2\text{C}-\overset{\text{CH}_3}{\underset{\text{CH}_3}{\text{C}}}\text{S}-\text{H}$    | 11.22 | 8.7  | 13.8 | 15.8 | 12.0 | 10.7 |
| 51 | $\text{HS}-(\text{CH}_2)_2\text{S}-\text{H}$                                                                | 9.05  | 14.2 | 12.3 | 14.5 | 9.2  | 8.9  |
| 52 |                          | 8.82  | 5.4  | 10.8 | 14.0 | 9.3  | 6.8  |
| 53 |                          | 10.69 | 6.0  | 13.4 | 15.9 | 12.7 | 10.0 |
| 54 |                          | 6.39  | 5.1  | 8.3  | 11.5 | 6.6  | 5.9  |
| 55 | $\text{HO}-(\text{CH}_2)_4\text{S}-\text{H}$                                                                | 10.19 | 6.6  | 12.2 | 15.5 | 10.7 | 9.8  |
| 56 | $\text{H}_3\text{COCCH}_2\text{CH}_2\text{S}-\text{H}$                                                      | 9.33  | 6.4  | 11.6 | 14.7 | 10.8 | 8.5  |
| 57 | $\text{HS}-(\text{CH}_2)_4\text{S}-\text{H}$                                                                | 9.88  | 5.6  | 13.5 | 15.1 | 10.3 | 8.4  |
| 58 | $\text{HSH}_2\text{CH}_2\text{CHNCO}\overset{\text{O}}{\parallel}\text{NHCH}_2\text{CH}_2\text{S}-\text{H}$ | 9.26  | 6.5  | 13.1 | 13.6 | 8.9  | 9.3  |

**Table S3** The  $pK_a$ 's and molecular  $V_{S,\min}$  (kcal/mol) of fluoromethyl and fluoroethyl thiol.

| R            | Entry | thiols                                | $pK_a$ | $V_{S,\min}$ (kcal/mol) |
|--------------|-------|---------------------------------------|--------|-------------------------|
| fluoromethyl | 1     | HS-CH <sub>2</sub> F                  | 8.8    | -31.50                  |
|              | 2     | HS-CHF <sub>2</sub>                   | 3.1    | -23.57                  |
|              | 3     | HS-CF <sub>3</sub>                    | -0.8   | -12.65                  |
| fluoroethyl  | 4     | HS-CH <sub>2</sub> CH <sub>2</sub> F  | 10.9   | -40.19                  |
|              | 5     | HS-CHF-CH <sub>3</sub>                | 8.9    | -33.20                  |
|              | 6     | HS-CH <sub>2</sub> CHF <sub>2</sub>   | 9.9    | -34.41                  |
|              | 7     | HS-CHF-CH <sub>2</sub> F              | 6.6    | -27.48                  |
|              | 8     | HS-CF <sub>2</sub> -CH <sub>3</sub>   | 4.8    | -21.72                  |
|              | 9     | HS-CH <sub>2</sub> CF <sub>3</sub>    | 7.6    | -21.85                  |
|              | 10    | HS-CF <sub>2</sub> -CH <sub>2</sub> F | 1.3    | -20.69                  |
|              | 11    | HS-CHF-CF <sub>3</sub>                | 3.7    | -22.20                  |
|              | 12    | HS-CF <sub>2</sub> -CHF <sub>2</sub>  | 0.3    | -17.03                  |
|              | 13    | HS-CF <sub>2</sub> CF <sub>3</sub>    | -1.1   | -10.60                  |
